# Supplementary material for: Novel Hybrid Inulin–Soy Protein Nanoparticles Simultaneously Loaded with (-)-Epicatechin and Quercetin and Their In Vitro Evaluation
Source: MDPI journal article supplement (doi:10.3390/nano13101615), 2023-05-11
Supplement: s1 [file s1]

## *Supplementary Material*

**Supplementary Table S1.** Release exponents in each equation and description of meaning.

| <b>Mathematical model</b>                            |                                                                                          | <b>Reference</b>                  |
|------------------------------------------------------|------------------------------------------------------------------------------------------|-----------------------------------|
| <b>Peppas &amp; Korsmeyer</b>                        |                                                                                          | [21]                              |
| Release exponent (n)                                 | Geometry                                                                                 | Drug release mechanism model      |
| 0.50<br>0.45<br>0.43                                 | Planar (thin films)<br>Cylinders<br>Spheres                                              | Fickian diffusion                 |
| 0.50 < n < 1.0<br>0.45 < n < 0.89<br>0.43 < n < 0.85 | Planar (thin films)<br>Cylinders<br>Spheres                                              | Anomalous (non-Fickian transport) |
| 1.0<br>0.89<br>0.85                                  | Planar (thin films)<br>Cylinders<br>Spheres                                              | Case Type I transport             |
| n > 1<br>n > 0.89<br>n > 0.85                        | Planar (thin films)<br>Cylinders<br>Spheres                                              | Super Case Type II transport      |
| <b>Weibull</b>                                       |                                                                                          | [25]                              |
| b = 1                                                | First-order release obeying Fick's first law of diffusion                                |                                   |
| b > 1                                                | Indicative of complex release mechanism                                                  |                                   |
| b < 0.35                                             | Highly disordered spaces much different than the percolation cluster                     |                                   |
| b ~ 0.35 – 0.39                                      | Diffusion in the fractal substrate                                                       |                                   |
| 0.39 < b < 0.69                                      | Diffusion in the fractal or disordered substrate                                         |                                   |
| b ~ 0.69 – 0.75                                      | Diffusion in normal Euclidian space                                                      |                                   |
| 0.75 < b < 1                                         | Diffusion in normal Euclidian substrate with a contribution of another release mechanism |                                   |
| <b>Lidner Lippold</b>                                |                                                                                          | [25]                              |
| b ~ negative values                                  | Without an initial burst effect                                                          |                                   |
| b ~ positive values                                  | With an initial burst effect                                                             |                                   |

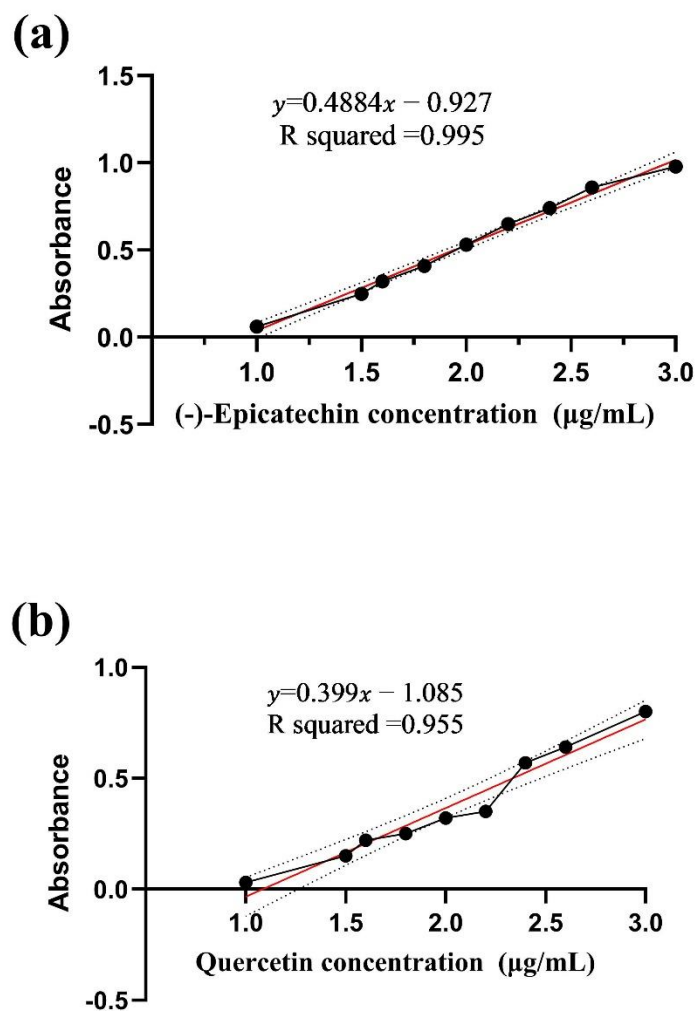

**Supplementary Figure S1.** Calibration curves for quantification of Released (-)-Epicatechin and Quercetin. The validated HPLC method was used to quantify the released (-)-Epicatechin and Quercetin. Both calibration curves were prepared at pH 7.4 and 37°C. (a) (-)-Epicatechin Calibration Curve:  $R^2=0.995$ , (b) Quercetin Calibration Curve:  $R^2=0.955$ .

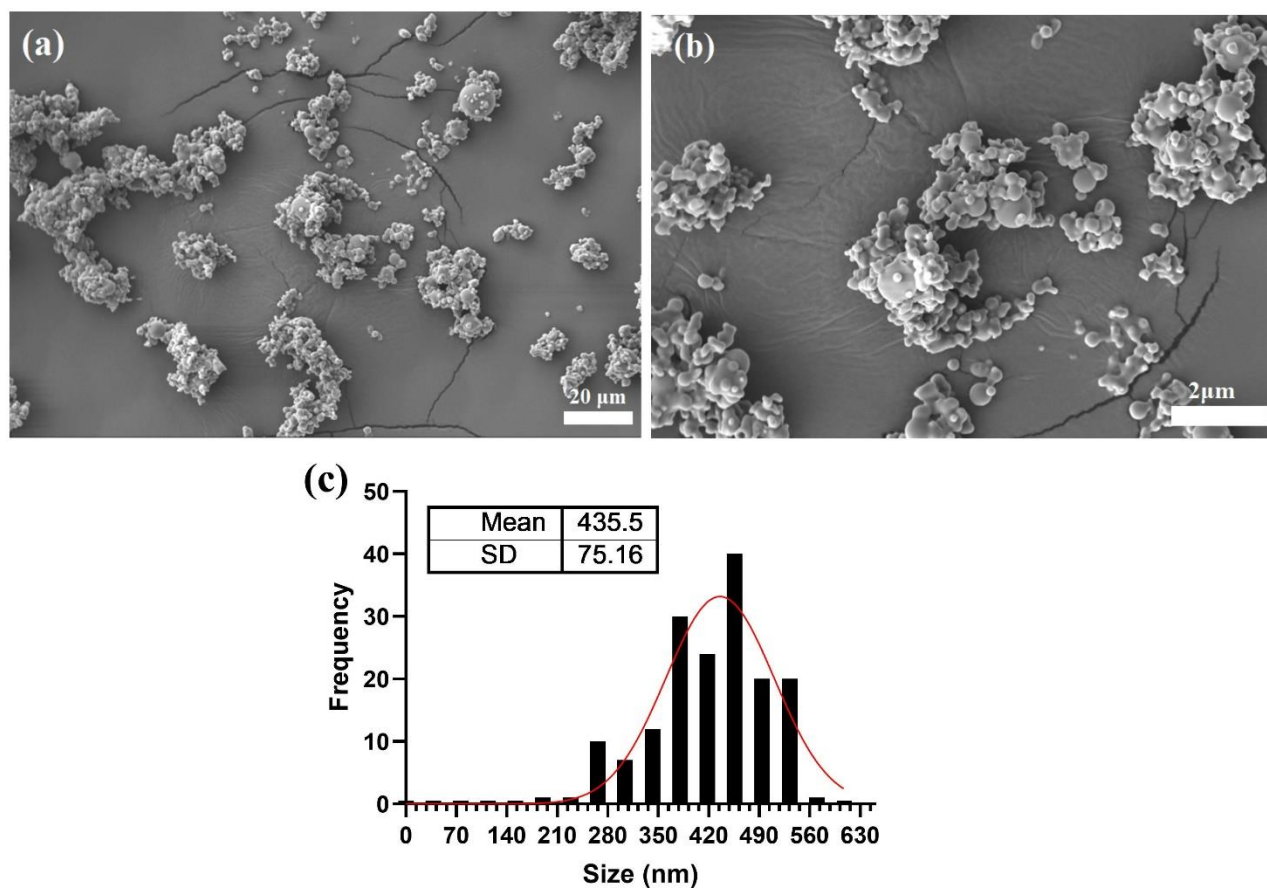

**Supplementary Figure S2.** Size Characterization by Scanning Electron Microscopy (SEM) of NBPs. (a) and (b) present images of Inulin nanoparticles loaded with flavonoids ((-)- Epicatechin and Quercetin) NBPs. The particle size distribution histograms of NPs (c) were obtained with 165 particles from different areas of the sample, and a non-linear regression of Gaussian type was performed to obtain the average size of the nanoparticles.
